# Supplementary material
Source: ML conference proceedings conference paper supplement (https://proceedings.neurips.cc/paper_files/paper/2020/hash/c81e728d9d4c2f636f067f89cc14862c-Abstract.html)
Supplement: Supplementary file [file c81e728d9d4c2f636f067f89cc14862c-Supplemental.pdf]

---

# Continuous Surface Embeddings

---

Anonymous Author(s)

Affiliation

Address

email

## 1 Appendix A

### 2 1.1 Discrete Laplace-Beltrami operator

3 **Laplace-Beltrami operator**  $(W, A)$ . In order to construct the discrete Laplace-Beltrami Operator  
 4 (LBO), and with reference to the notation introduced in the main manuscript, we assume that the  
 5 points  $X_k$  are the vertices of a *simplicial mesh*, i.e. the union  $\tilde{S} = \cup_{f \in F} f$  of a finite set  $F$  of  
 6 triangular faces  $f$ , approximating the 3D surface  $S$ . With slight abuse of notation, we denote each  
 7 face  $f = (X_1, X_2, X_3)$  as a triplet of vertices oriented in clockwise order with respect to the normal  
 8  $N_f$  of the face. If we assume that the function  $r$  is continuous and linear within each face, then the  
 9 samples fully specify the function. Let  $b_1 = X_3 - X_2$ ,  $b_2 = X_1 - X_3$  and  $b_3 = X_2 - X_1$ , be  
 10 the edge vectors opposite to each vertex of the triangle  $f$  and let  $A_f$  be its area. The gradient of  $r$ ,  
 11 which is constant on each face  $f$ , is given by:

$$(\nabla r)_f = \frac{1}{2A_f} \sum_{i=1}^3 (N_f \times b_i) r_{f_i} = G_{ff}, \quad f = \begin{bmatrix} r_{f_1} \\ r_{f_2} \\ r_{f_3} \end{bmatrix} \quad A_f = \frac{1}{2} |b_1 \times b_2|, \quad N_f = \frac{1}{2A_f} (b_1 \times b_2). \quad (1)$$

12 The *Dirichlet energy* of the function  $r$  is the integral of the squared gradient norm:  $\int_{\tilde{S}} \|\nabla r\|^2 dS =$   
 13  $\sum_{f \in F} A_f \|(\nabla r)_f\|^2 = \sum_{f \in F} W_f^\top W_{ff}$ , where  $A_f$  is the area of face  $f$  and  $W_f = A_f G_f^\top G_f$ . By  
 14 summing  $L_f$  over the faces, we obtain the overall LBO operator  $W \in \mathbb{R}^{K \times K}$  mapping to the total  
 15 Dirichlet energy  $W$  (since this energy is non-negative,  $W$  is positive semi-definite). We also need  
 16 the diagonal matrix  $A$  of *lumped areas*, with  $A_{kk}$  being a third of the total areas of the triangles  
 17 incident on vertex  $X_k$ .<sup>1</sup>

**Gradient operator**  $G_f$ . We can verify the expression eq. (1) for the gradient as follows. The  
 gradient dotted with an edge vector  $b_i$  must give the function change along that edge. For example,  
 for edge  $b_1$  we have:

$$\langle b_1, (\nabla r)_f \rangle = \sum_{i=1}^3 \frac{\langle b_1, N_f \times b_i \rangle}{2A_f} r_{f_i} = \frac{\langle N_f, b_2 \times b_1 \rangle}{2A_f} r_{f_2} + \frac{\langle N_f, b_3 \times b_1 \rangle}{2A_f} r_{f_3} = r_{f_3} - r_{f_2}.$$

We can write matrix  $G_f$  in eq. (1) much more compactly as:

$$G_f = \frac{1}{2A_f} \hat{N}_f B_f, \quad B_f = B_f \hat{\mathbf{1}}^\top, \quad V_f = [X_1 \quad X_2 \quad X_3], \quad \hat{a} = \begin{bmatrix} 0 & -a_3 & a_2 \\ a_3 & 0 & -a_1 \\ -a_2 & a_1 & 0 \end{bmatrix},$$

18 Here  $\hat{\cdot}$  is the hat operator, such that  $a \times b = \hat{a}b$ , and  $\mathbf{1} = (1, 1, 1)$ , so that  $B_f = [b_1 \quad b_2 \quad b_3]$ . By  
 19 summing  $G_f$  over the faces  $f$ , we obtain an discrete operator  $G \in \mathbb{R}^{3|F| \times K}$  mapping the function  
 20 to the gradient in each face.

---

<sup>1</sup>This is a required normalization factor to account for the different areas of the triangles w.r.t. the continuous surface being approximated.

**Cotangent weight matrix  $W$ .** Given the expression for  $G_f$ , we can find a compact expression for  $W_f$  in the LBO:

$$W_f = A_f G_f^\top G_f = \frac{1}{4A_f} B_f^\top B_f.$$

Note that  $B_f^\top \hat{N}_f^\top \hat{N}_f B_f = B_f^\top B_f$  because  $b_i \perp N_f$  and thus:

$$\langle N_f \times b_i, N_f \times b_j \rangle = \langle N_f, N_f \rangle \langle b_i, b_j \rangle - \langle N_f, b_j \rangle \langle N_f, b_i \rangle = \langle b_i, b_j \rangle.$$

21  $W_f$  matches the usual *cotangent discretization* of the Laplace-Beltrami operator:  $B_f$  contains dot  
22 products of edges,  $2A_f$  the norm of their cross products, and the ratio of these two are cotangents.

**Divergence operator  $D$ .** Finally, we sometimes require a divergence operator. For this, let  $X_f \in \mathbb{R}^3$  a vector defined on each face. In order to compute the divergence at a vertex  $X_1$ , we find the contour integral of  $X_f$  along the boundary of the triangle fan centered at  $X_1$ . Thus let  $f = (X_1, X_2, X_3)$  be a face belonging to this fan and  $b_1, b_2, b_3$  be the corresponding edge vectors as before. The contribution of this triangle to the contour integral around  $X_1$  is:

$$D_v X_f = |b_2| \cdot \langle n, X_f \rangle, \quad n|b_2| = b_2 \times N_f = \frac{1}{2A_f} b_2 \times (b_3 \times b_1) = b_3 \frac{\langle b_2, b_1 \rangle}{2A_f} - b_1 \frac{\langle b_2, b_3 \rangle}{2A_f}$$

## 23 1.2 Spectra interpolation of correspondences (ZoomOut)

24 Assume that we have complete correspondences for the mesh  $S'$ , in the sense that  $k'_j = j$ ,  
25  $j = 1, \dots, K'$ . We can encode those as a permutation matrix  $\Pi$  such that  $\Pi_{ij} = \delta_{k_i=j}$ , map-  
26 ping functions on  $S$  to function  $' = \Pi$  on  $S'$  (this is analogous to backward warping). This can  
27 be rewritten in ‘Fourier’ space as  $' = U' = U'C = \Pi = \Pi U$ , which gives us the constraint [1]  
28  $U'C = \Pi U$ . We can use this equation to find  $C$  given  $\Pi$ , or to find  $\Pi$  given  $C$ . Finding  $\Pi$  is done  
29 in a greedy manner, searching, for each row of  $U'C$ , the best matching row in  $U$  (in  $L^2$  distance).  
30 Finding  $C$  is done by minimizing  $\|U'C - \Pi U\|_A^2$ , which results in  $C = (U')^\top A \Pi U$ .

31 In practice, we found it beneficial to add three more standard constraints when resolving for  $C$ .  
32 First, let  $\Gamma \in \{0, 1\}^{K \times K}$  be the symmetry matrix mapping each vertex of mesh  $S$  to its symmetric  
33 counterpart (this is trivially determined for our canonical models), and let  $\Gamma'$  be the same for  $S'$ .  
34 Then a correct correspondence  $\Pi$  between meshes must preserve symmetry, in the sense that  $\Gamma' \Pi =$   
35  $\Pi \Gamma$ ; this constraint can be rewritten in Fourier space as  $\hat{\Gamma}' C = C \hat{\Gamma}$ , where  $\hat{\Gamma} = U \Gamma U^\dagger$ . For  
36 isometric meshes, the exact same reasoning applies to the LBO  $L = A^{-1} W$  because the LBO is an  
37 intrinsic property of the surface (i.e. invariant to isometry). Our meshes are not isometric, but, after  
38 resizing them to have the same total area, we can use the constraint  $L' \Pi \approx \Pi L$  in a soft manner for  
39 regularization; it is easy to show that this reduces to  $\Lambda' C \approx C \Lambda$  where  $\Lambda$  is the matrix of eigenvalues  
40 of the LBO. In practices, this encourages  $C$  to be roughly diagonal. Finally, we use the method just  
41 described twice, to estimate jointly a mapping  $C$  from mesh  $S$  to  $S'$ , and another  $C'$  going in the  
42 other direction, and enforce  $C C' \approx I$  (cycle consistency).

## 43 2 Appendix B

### 44 2.1 Annotation process

45 We are following an annotation protocol similar to the one described in the original DensePose  
46 work [2]. We start with instance mask annotations provided in the LVIS dataset and crop images  
47 around each instance. We only annotate instances with bounding boxes larger than 75 pixels. We  
48 do not collect annotations for body segmentation: instead, the points are sampled from the whole  
49 foreground region represented by the object mask. The annotators are then shown randomly sampled  
50 points displayed on the image and are asked to click on corresponding points in multiple views  
51 rendered from a 3D model representing the given species. Each worker is asked to annotate 3 points  
52 on a single object instance. The points on the rendered views are mapped directly to vertex indices  
53 of the corresponding model. Each mesh is normalised to have approximately 5k vertices.

### 54 2.2 Implementation details

55 Compared to the original DensePose [3] models, we introduced the following changes:

- 56 • single channel mask supervision as a replacement of the 15-way segmentation;
- 57 • RoI pooling size for the DensePose task is set to  $28 \times 28$ ;
- 58 • a decoder module based on Panoptic FPN, as implemented in [4];
- 59 • for the DeepLab models, the head architecture corresponds to [4];
- 60 • IUUV training, weights of individual loss terms:  $w_{mask} = 5.0$  (body mask),  $w_i = 1.0$  (point  
61 body indices),  $w_{uv} = 0.01$  ( $uv$  coordinates);
- 62 • CSE training, weight on the embedding loss term:  $w_e = 0.6$ .

63 For the DensePose-COCO dataset, all models are trained with the standard s1x schedule [5] for 130k  
64 iterations. On the LVIS and DensePose-Chimps datasets, the models are trained for 5k iterations  
65 with the learning rate drop by the factor of 10 after 4000k and 4500k iterations.

66 For the evaluation purposes all 3D meshes are normalised in size to have the same geodesic distance  
67 between the pair of most distant points as the SMPL model ( $P_{dist.,max} = 2.5$ ). For the animal  
68 classes, we do not employ part specific normalisation coefficients, as done in the updated DensePose  
69 evaluation protocol.

70 The code, the pretrained models and the annotations for the LVIS dataset will be publicly released.

## 71 **References**

- 72 [1] Danielle Ezuz and Mirela Ben-Chen. Deblurring and Denoising of Maps between Shapes. *Com-*  
73 *puter Graphics Forum*, 36(5):165–174, 2017.
- 74 [2] Riza Alp Güler, Natalia Neverova, and Iasonas Kokkinos. DensePose: Dense human pose  
75 estimation in the wild. In *Proc. CVPR*, 2018.
- 76 [3] Riza Alp Güler, Natalia Neverova, and Iasonas Kokkinos. DensePose: Dense Human Pose  
77 Estimation in the Wild. In *IEEE Conference on Computer Vision and Pattern Recognition*  
78 *(CVPR)*, pages 7297–7306, 2018.
- 79 [4] Artsiom Sanakoyeu, Vasil Khalidov, Maureen S. McCarthy, Andrea Vedaldi, and Natalia  
80 Neverova. Transferring Dense Pose to Proximal Animal Classes. In *IEEE Conference on Com-*  
81 *puter Vision and Pattern Recognition (CVPR)*, 2020.
- 82 [5] Yuxin Wu, Alexander Kirillov, Francisco Massa, Wan-Yen Lo, and Ross Girshick. Detectron2.  
83 <https://github.com/facebookresearch/detectron2>, 2019.
